# Supplementary material
Source: PubMed Central journal article supplement (PMC2844321)
Supplement: supp_123_7_1124__1.pdf [file supp_123_7_1124__1.pdf]

**A****PALB2**

1 MDEPPGKPLS CEEKEKLEKE LAFLKREYSK TLARLQRAQR AEKIKHSIKK **TVEEQDCLSQ**  
 61 **QDLSPQLKHS** EPKNKICVYD KLHIK**THLDE** **ETGEK**TSITL DVGPEFSNPG DGPGLPIQR  
 121 TDDTQEHFPH RVSDPSGEQK QKLPSRRKKQ QKRTFISQER **DCVFGTDSL**R LSGKRL**KEQE**  
 181 **EISSKNPARS** **PVTEIR**THLL SLKSELDPSP EPVTEINEDS VLIPTAQPE **KGVDTF**LRRP  
 241 NFTRATVPL QTLSDSGSSQ HLEHIPP**GS** **SELTHDL**KN IR**FTSPV**SL **AQGKMT**VST  
 301 **DNLLVN**KAIS KSGQLPTSSN LEANISCSLN ELTYNNLPAN ENQNLKEQNQ TEKSLK**SPSD**  
 361 **TLDGRNENLQ** **ESEILSQPKS** **LSLEATSPLS** **AEKHSCTVPE** GLLFPAEYV RTRRSMSNCQ  
 421 **RKVAVEAVIQ** **SHLDVK**KKGF KNKNKDASKN **LNLSNEETDQ** **SEIR**MSGTCT GQPSRRTSQK  
 481 **LLSLTKVSSP** **AGPTEDNDLS** **RKAVAQAPGR** RYTGRKSAC TPASDHCEPL LPTSSLSIVN  
 541 **RSKEEVTSHK** YQHEKLFIQV KGKSRHQKE DSLSWSNSAY LSLDDDAFTA PFHRDGMLSL  
 601 KQLLSFLSIT DFQLPDEDFG PLKLEKVK**SC** **SEKPV**EPFES **KMFGER**HLE GSCIFPEELS  
 661 PKRMDTEMED LEEDLIVLPG KSHPKRPNQ SQHTKTGLSS SILLYTPLNT VAPDDNDRPT  
 721 TDMCSPAFPI LGTTPAFGPQ GSYEKASTEV AGRTCCTPQL AHLK**DSVCLA** **SDTKQ**FDSSG  
 781 SPAKPHTTLQ VSGRQQPTC DCDSVPPGTP PPIESFTFKE NQLCR**NTCQE** **LHKHS**VEQTE  
 841 TAEPLASDSI NPGNLQLVSE LKNPSGSCSV DVSAMFWERA GCKEPCIITA CEDVVS**LWKA**  
 901 **LDAWQ**WEKLY TWHFAEVPVL QIVVPDVYN LVCVALGNLE IREIR**ALFCS** **SDDESEK**QVL  
 961 LKSGNIKAVL GLTKRRLVSS SGTLSDQQVE VMTFAEDGGG KENQFLMPPE ETILTFAEVQ  
 1021 GMQEALLGTT IMNNIVIWNL KTGQLLKKMH IDDSYQASVC HKAYSEMGLL FIVLSHPCA  
 1081 ESES**LRSPVF** **QLIVINPKTT** LSVGVMLYCL PPGQAGRFL **GDVKDHCAA** ILTSGTIAIW  
 1141 DLLLQCTAL LPPVSDQHWS FVKWSGTDSH LLAGQK**DGNI** **FVYHYS**

**B****MRG15**

1 MAPKQDPKPK FQEGERVLCF HGPLLYEAKC VKVAIKDKQV KYFIHYSQWN **KNWDEWPES**  
 61 **RVLKYVD**TNL **QKQ**RELQKAN QEYAEQKMR GAAPGKKTSG LQQKNVEVKT **KNKQK**TPGN  
 121 **GDGGSTSETP** **QPPR**KKRARV **DPTVENEETF** **MNR**VEVKVKI PEELKPWLVD DWDLITRQKQ  
 181 **LFYLP**AKKNV DSILEDYANY KKS**RGNTDNK** **EYAVNEVVAG** **IKEYF**NMLG TQLLYKFERP  
 241 QYAEILADHP DAPMSQVYGA PHLLRLFVRI **GAMLAYTPLD** **EKSLALLL**NY LHDFLKYLAK  
 301 **NSATLFSASD** **YEVAPPEYHR** KAV
