# Supplementary material
Source: PubMed Central journal article supplement (PMC2844321)

**A**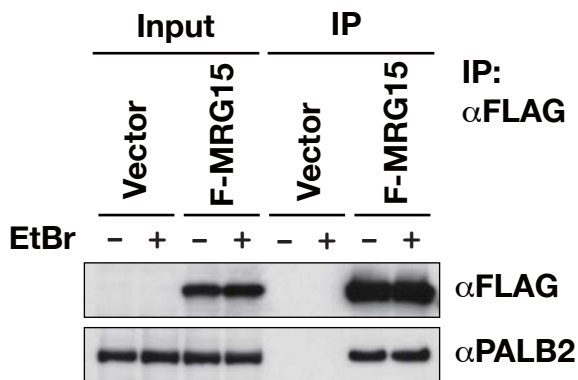**B**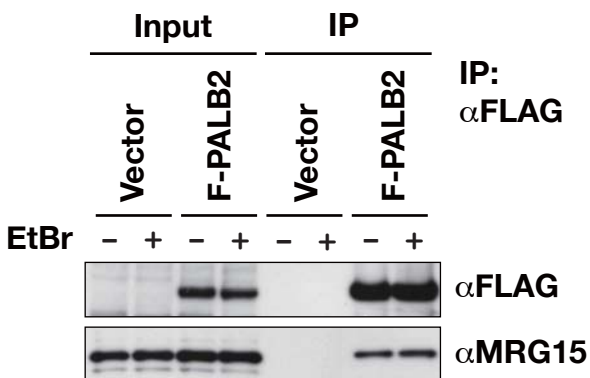

Supplement: supp_123_7_1124__2.pdf [file supp_123_7_1124__2.pdf]

**A**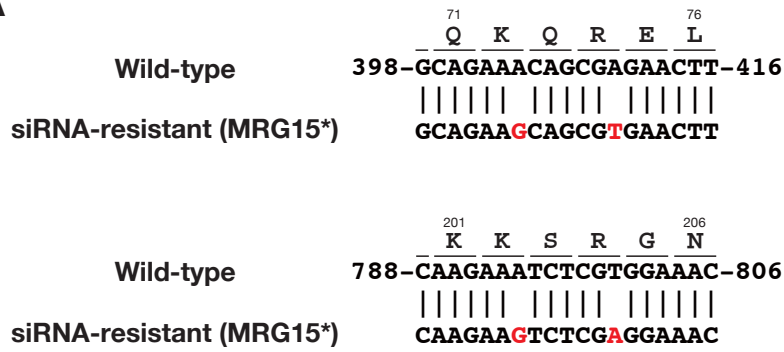**B**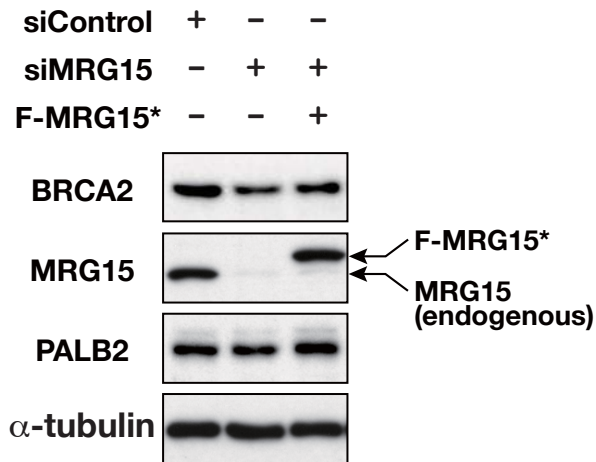**C**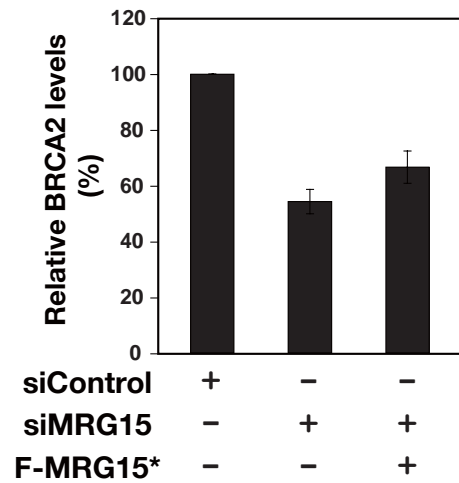**D**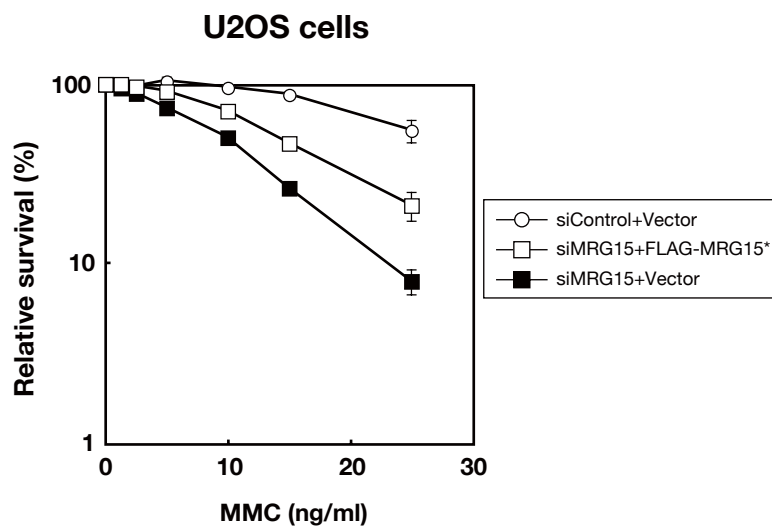

Supplement: supp_123_7_1124__3.pdf [file supp_123_7_1124__3.pdf]

**A**

U2OS cells

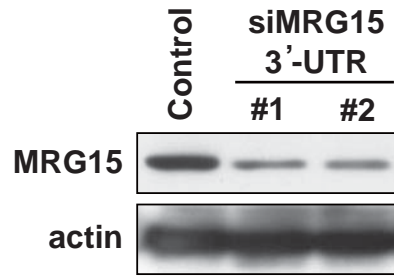**B**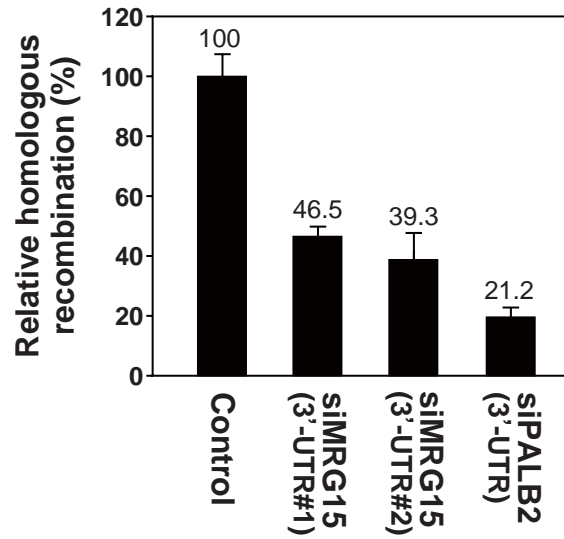**C**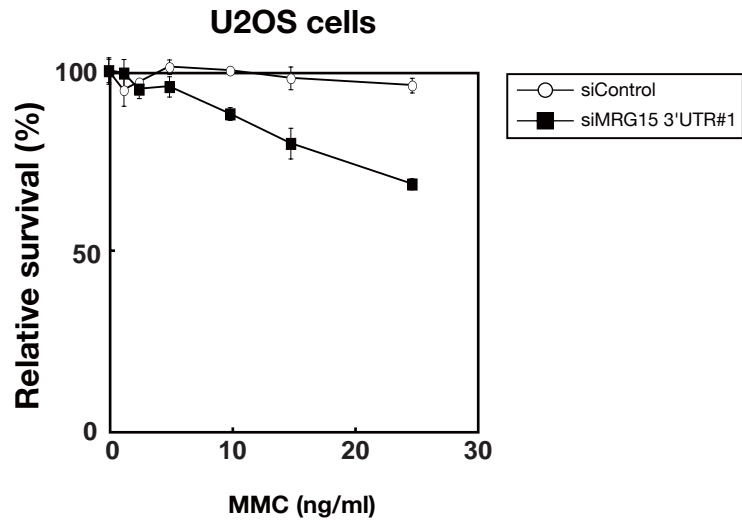

Supplement: supp_123_7_1124__4.pdf [file supp_123_7_1124__4.pdf]

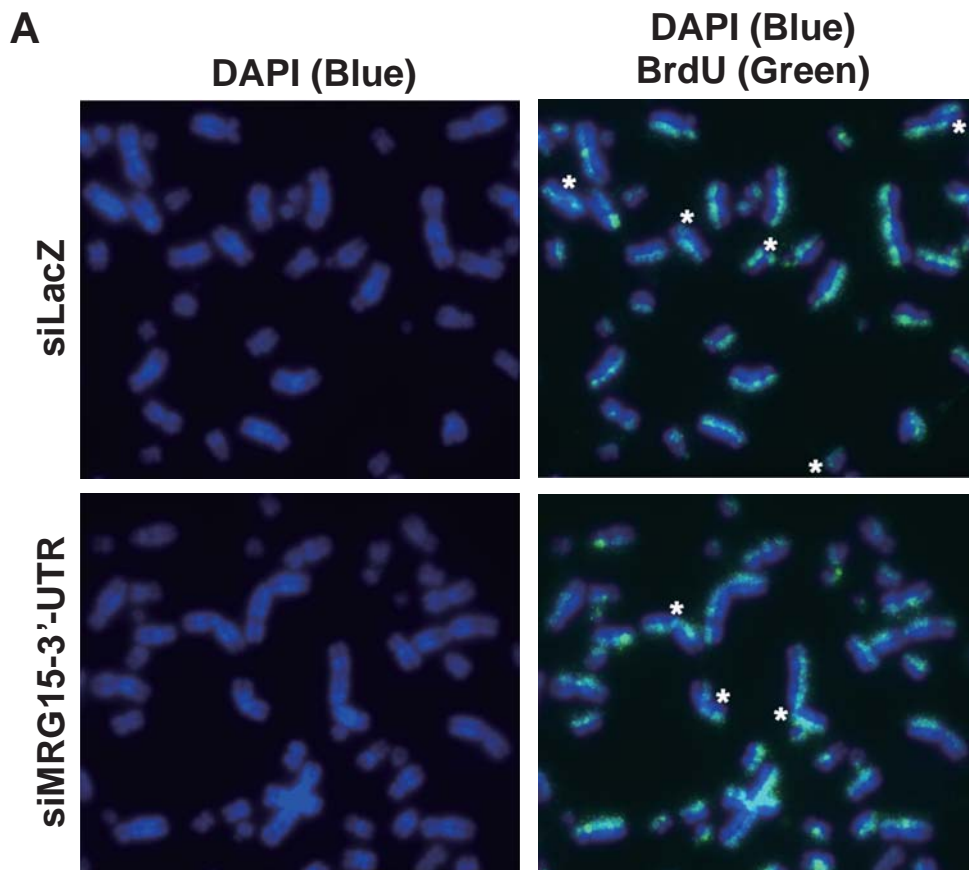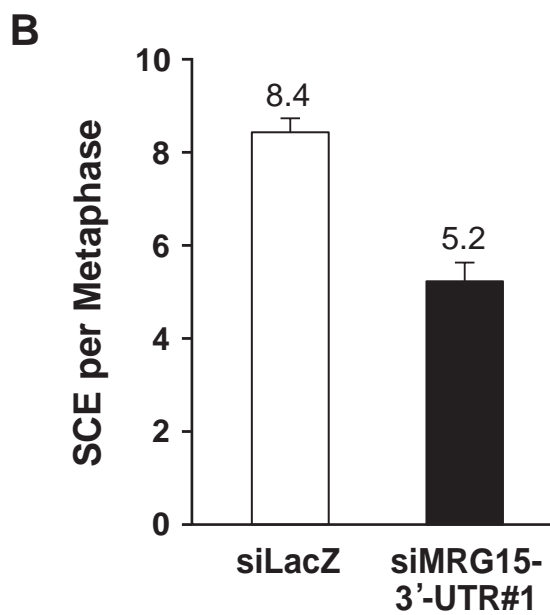

Supplement: supp_123_7_1124__5.pdf [file supp_123_7_1124__5.pdf]

**A**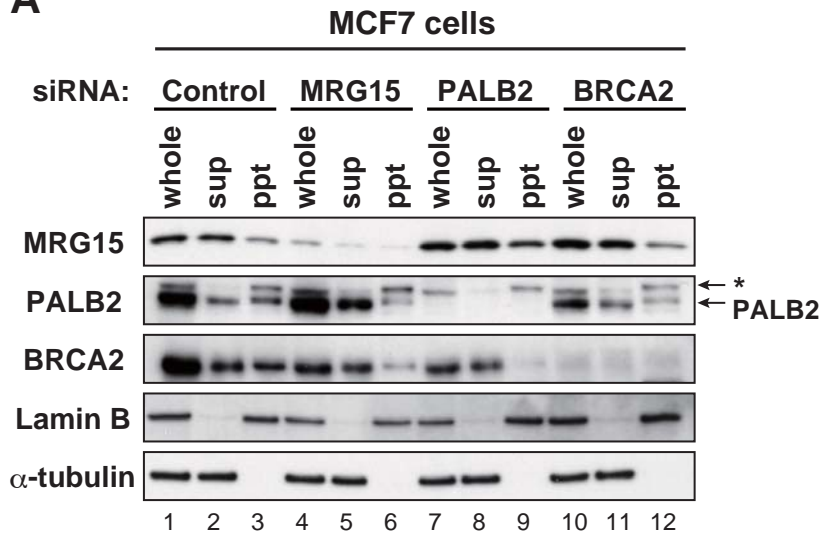**B**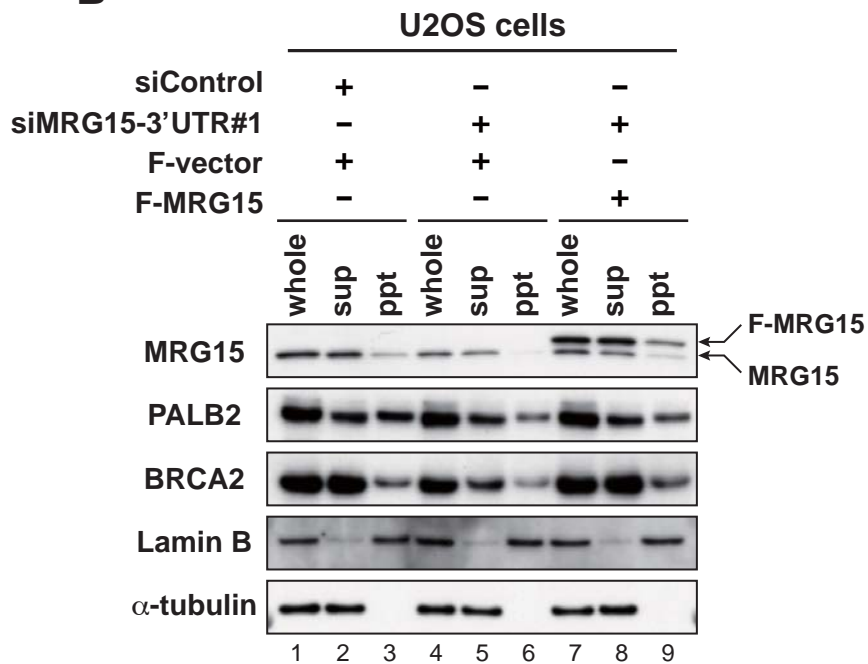

Supplement: supp_123_7_1124__6.pdf [file supp_123_7_1124__6.pdf]

**A**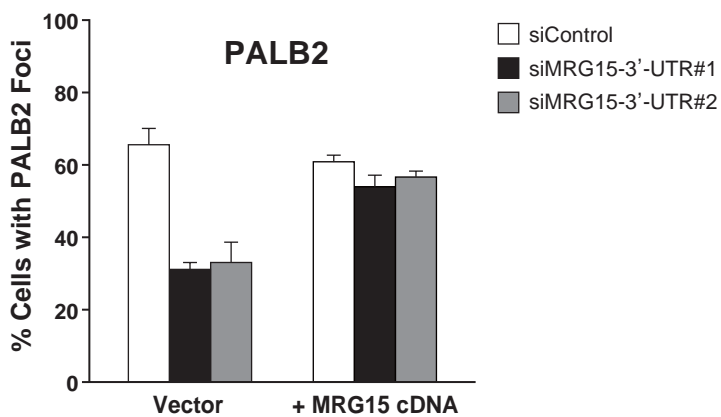**B**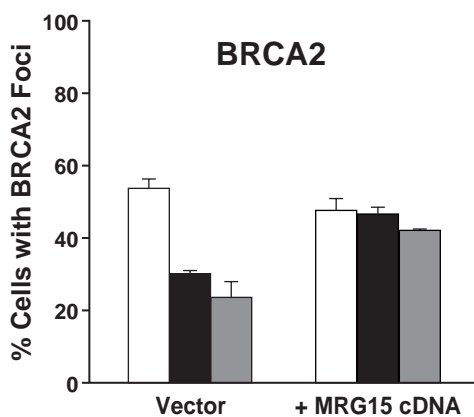**C**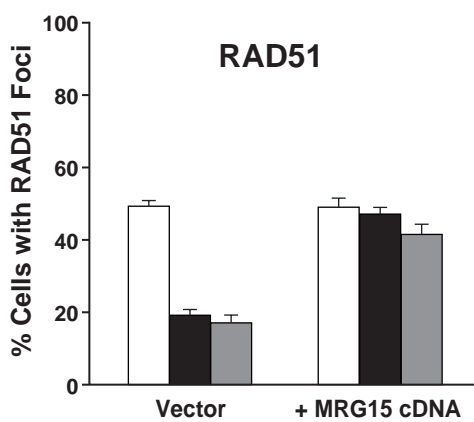**D**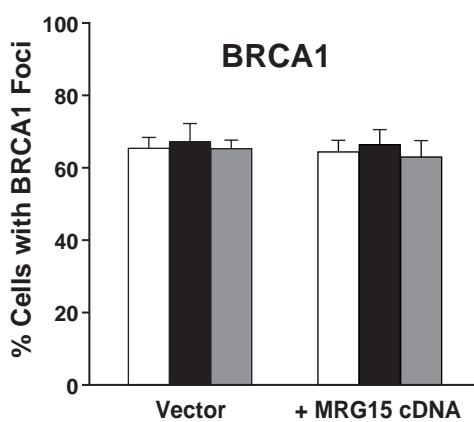

Supplement: supp_123_7_1124__7.pdf [file supp_123_7_1124__7.pdf]
